# Supplementary material for: A multi-nuclear magnetic resonance and density functional theory investigation of epitaxially grown InGaP2
Source: Royal Society of Chemistry journal article supplement (doi:10.1039/c5cp04593b), 2016-01-01
Supplement: c5cp04593b1.pdf [file c5cp04593b1.pdf]

# A Multi-Nuclear Magnetic Resonance And Density Functional Theory Investigation Of Epitaxially Grown InGaP<sub>2</sub>

P. J. Knijn, P. J. M. van Bentum, C. M. Fang, G. J. Bauhuis, G. A. de Wijs\* and A. P. M. Kentgens\*

Radboud University, Institute for Molecules and Materials,  
Heyendaalseweg 135, NL-6525 AJ Nijmegen, The Netherlands.  
E-mail: g.dewijs@science.ru.nl, a.kentgens@nmr.ru.nl

Table S1: Calculated and experimental lattice constants  $a$  in  $10^{-10}$  m. <sup>a</sup>Experimental numbers from: <http://www.ioffe.ru/SVA/NSM/Semicond/index.html>. <sup>b</sup>Based on pure compounds, assuming linear scaling of  $a$  with composition.

|                    | PBE  | exp.                |
|--------------------|------|---------------------|
| GaP                | 5.51 | 5.4505 <sup>a</sup> |
| InGaP <sub>2</sub> | 5.73 | 5.6596 <sup>b</sup> |
| InP                | 5.96 | 5.8687 <sup>a</sup> |

Table S2: Standard deviations of Ga and In isotropic chemical shifts in ppm calculated for the disordered model for four different lattice constants  $a$ . The numbers for  $a = 5.6596 \times 10^{-10}$  m are reported in the main text in Table 4. The relaxed lattice constant is  $5.73 \times 10^{-10}$  m. See Table S4 for details.

|                     |        |        |      |        |
|---------------------|--------|--------|------|--------|
| In                  | 25.4   | 20.3   | 19.2 | 16.9   |
| Ga                  | 10.1   | 8.9    | 8.6  | 7.8    |
| $a$ ( $10^{-10}$ m) | 5.4505 | 5.6596 | 5.73 | 5.8687 |

Table S3: Calculated isotropic <sup>31</sup>P chemical shifts in ppm at the PBE optimized lattice constants ( $a$ [PBE]) and the experimental lattice constants ( $a$ [exp.]) from Table S1. The <sup>31</sup>P shifts are referenced such that  $\delta_{\text{iso}} = -142$  ppm for bulk GaP at its experimental lattice constant.

|     | $a$ [PBE] | $a$ [exp.] |
|-----|-----------|------------|
| GaP | -113.6    | -142.0     |
| InP | -120.6    | -160.9     |

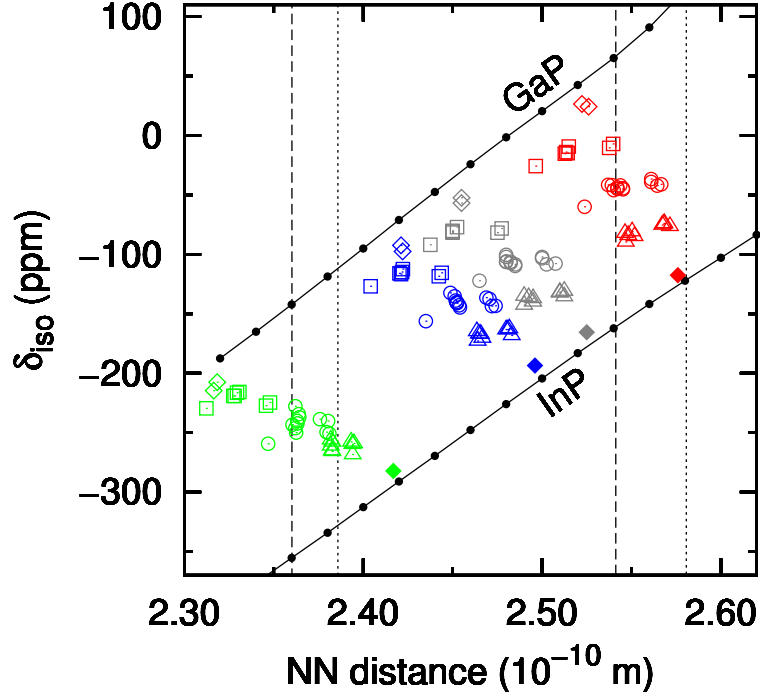

Figure S1:  $^{31}\text{P}$  isotropic chemical shifts for bulk GaP and InP (black dots) as a function of the nearest neighbour distance. The lines are guides to the eye. Vertical dashed [dotted] lines indicate the experimental [calculated PBE] bulk GaP (left) and InP (right) lattice constants. Diamonds:  $^{31}\text{P}$  isotropic chemical shifts versus average nearest neighbour distance for the 32 P nuclei in the  $\text{In}_{0.5}\text{Ga}_{0.5}\text{P}$  disordered model, with  $a = 5.4505 \times 10^{-10}$  m (green),  $a = 5.6596 \times 10^{-10}$  m (blue, reported in Figure 9 in main text),  $a = 5.73 \times 10^{-10}$  m (grey, relaxed lattice constant), and  $a = 5.8687 \times 10^{-10}$  m (red). Coordinations  $\text{P}[\text{Ga}_n\text{In}_{4-n}]$ , diamonds:  $n = 4$ , squares:  $n = 3$ , circles:  $n = 2$ , triangles:  $n = 1$ , solid diamonds:  $n = 0$ . All  $^{31}\text{P}$  shifts are referenced such that  $\delta_{\text{iso}} = -142$  ppm for bulk GaP at its experimental lattice constant. The shifts of the random models are listed in Table S4.

Table S4: Calculated  $^{31}\text{P}$  chemical shifts  $\delta_{\text{iso}}$  in ppm for various coordinations  $\text{P}[\text{Ga}_n\text{In}_{4-n}]$  for the random model for three different lattice constants  $a$ . Data for all 32 nuclei are listed. The periodically repeated cell has dimensions  $2a \times 2a \times 2a$ . Atomic positions were relaxed. The cells were kept fixed. The  $^{31}\text{P}$  shifts are referenced such that  $\delta_{\text{iso}} = -142$  ppm for bulk GaP at its experimental lattice constant.

|                                     |         |         |         |         |
|-------------------------------------|---------|---------|---------|---------|
| P[Ga <sub>4</sub> ]                 | -214.67 | -97.63  | -56.85  | 24.32   |
|                                     | -207.62 | -92.43  | -52.37  | 26.55   |
| P[Ga <sub>3</sub> In <sub>1</sub> ] | -219.10 | -114.90 | -81.67  | -10.52  |
|                                     | -224.75 | -112.39 | -92.01  | -25.80  |
|                                     | -215.79 | -116.02 | -78.16  | -7.21   |
|                                     | -219.09 | -118.44 | -77.08  | -9.44   |
|                                     | -216.36 | -116.72 | -80.97  | -13.98  |
|                                     | -227.29 | -126.99 | -81.68  | -14.80  |
|                                     | -229.47 | -115.45 | -80.31  | -15.24  |
| P[Ga <sub>2</sub> In <sub>2</sub> ] | -240.30 | -144.63 | -103.35 | -39.22  |
|                                     | -250.87 | -141.03 | -107.67 | -41.14  |
|                                     | -249.65 | -137.65 | -108.43 | -42.30  |
|                                     | -259.23 | -135.24 | -122.21 | -59.93  |
|                                     | -238.61 | -132.54 | -102.26 | -36.64  |
|                                     | -234.43 | -143.34 | -102.26 | -41.67  |
|                                     | -227.72 | -136.42 | -100.44 | -41.61  |
|                                     | -243.37 | -142.93 | -106.13 | -41.89  |
|                                     | -246.29 | -143.58 | -108.44 | -44.55  |
|                                     | -240.18 | -156.21 | -106.34 | -43.84  |
|                                     | -250.01 | -140.14 | -106.09 | -45.90  |
|                                     | -242.16 | -138.87 | -109.88 | -45.43  |
| -237.14                             | -140.58 | -107.31 | -44.79  |         |
| P[Ga <sub>1</sub> In <sub>3</sub> ] | -259.04 | -172.91 | -135.19 | -82.29  |
|                                     | -257.79 | -170.55 | -136.16 | -80.86  |
|                                     | -255.89 | -166.87 | -142.70 | -89.48  |
|                                     | -261.12 | -162.34 | -139.91 | -84.98  |
|                                     | -268.48 | -163.38 | -137.16 | -83.98  |
|                                     | -265.75 | -168.24 | -130.99 | -73.95  |
|                                     | -265.02 | -163.43 | -131.87 | -74.39  |
|                                     | -257.82 | -164.82 | -135.65 | -76.50  |
| -259.87                             | -167.17 | -132.37 | -75.24  |         |
| P[In <sub>4</sub> ]                 | -282.15 | -193.49 | -165.47 | -117.60 |
| $a$ ( $10^{-10}$ m)                 | 5.4505  | 5.6596  | 5.73    | 5.8687  |

Table S5:  $^{31}\text{P}$  isotropic chemical shifts calculated at the PBE optimized lattice constant ( $5.73 \times 10^{-10}$  m) in ppm compared to experiment.  $^{31}\text{P}$  is referenced such that its shift is  $-142$  ppm for GaP at the PBE-optimized lattice constant  $a = 5.51 \times 10^{-10}$  m.

|                                     | n | experiment |        | random supercell |
|-------------------------------------|---|------------|--------|------------------|
|                                     |   | W20        | W50    |                  |
| P[Ga <sub>4</sub> ]                 | 4 | -86.6      | -87.2  | -83              |
| P[Ga <sub>3</sub> In <sub>1</sub> ] | 3 | -109.2     | -110.2 | -110             |
| P[Ga <sub>2</sub> In <sub>2</sub> ] | 2 | -135.3     | -136.4 | -135             |
| P[Ga <sub>1</sub> In <sub>3</sub> ] | 1 | -162.2     | -164.7 | -164             |
| P[In <sub>4</sub> ]                 | 0 | -191.2     | -194.7 | -194             |
